# Supplementary material
Source: PubMed Central journal article supplement (PMC3381335)
Supplement: NIHMS383846-supplement-Sup.pdf [file NIHMS383846-supplement-Sup.pdf]

**CAPTION for FIGURE 1:**

**FIGURE 1. Adjusted prefrontal cortex volume by group [Overall:  $F(2,42)=3.48$ ,  $p<0.04$ ,  $(f)=0.28$ ; At-risk (AR) with mood symptoms versus Controls:  $F(1,30)=1.78$ ,  $p<0.19$ ,  $(f)=0.23$ ; AR without mood symptoms versus Controls:  $F(1, 34)=6.12$ ,  $p<0.019$ ;  $(f)=0.42$ ]**
